# Isoflurane Anesthesia and Myocardial Ischemia: Comparative Risk versus Sufentanil Anesthesia in Patients Undergoing Coronary Artery Bypass Graft Surgery

Jacqueline M. Leung, M.D.,\* Paul Goehner, M.D.,† Brian F. O'Kelly, M.B.,‡ Milton Hollenberg, M.D.,§ Nito Pineda, M.D.,¶ Brian A. Cason, M.D.,\* Dennis T. Mangano, Ph.D., M.D.,\*\* the SPI Research Group††

Whether isoflurane has the potential to produce coronary artery steal and associated myocardial ischemia is still controversial. Previous studies addressing this issue in humans did not purposefully control hemodynamics or use continuous measures of myocardial ischemia. The authors used transesophageal echocardiography (TEE) and continuous Holter electrocardiography (ECG) to study the relative risk of myocardial ischemia during isoflurane or sufentanil anesthesia under strict control of hemodynamics in 186 high-risk patients undergoing elective coronary artery bypass graft (CABG) surgery. Overall, hemodynamics were well controlled (increased heart rate = 9.8%; increased systolic blood pressure = 7.1%; decreased systolic blood pressure = 10.8% of total prebypass time compared with preoperative baseline values), with no difference between the two anesthetics. In the 162 patients with interpretable TEE recordings, moderate to severe TEE ischemic episodes (grade change  $\geq 2$ ) developed in 33 (21%) during the prebypass period, with no difference between isoflurane (12 of 56 = 21%) and sufentanil (21 of 106 = 20%) ( $P = 0.97$ ). The duration and severity of TEE episodes were not significantly different between the two groups. No correlation was observed between TEE ischemic episodes and isoflurane concentrations (range, 0.47–1.75%). In the 181 patients with interpretable ECG recordings, ECG evidence of ischemia developed in 34 (19%) during the prebypass period, with no difference between isoflurane (12 of 59 = 20%) and sufentanil (22 of 122 = 18%) ( $P = 0.87$ ). The duration and severity of electrocardiographic ischemic episodes were also similar in patients receiving either isoflurane or sufentanil. Four of the 62 patients (6%) who received isoflurane had an adverse cardiac outcome *versus* 15 of 124 patients (12%) who received sufentanil ( $P = 0.34$ ). The authors' findings demonstrate that, when hemodynamics are controlled, the incidence of myocardial ischemia (TEE or ECG) during isoflurane and sufentanil anesthesia is similar. (Key words: Anesthesia: cardiac. Anesthetics, intravenous: sufentanil. Anesthetics, volatile: isoflurane. Heart: coronary artery

disease; myocardial ischemia. Monitoring: blood pressure; hemodynamics; Holter electrocardiography; pulse rate; transesophageal echocardiography. Surgery: coronary artery bypass graft.)

WHETHER ISOFLURANE has the potential to produce coronary artery steal and associated myocardial ischemia is still controversial.<sup>1,2</sup> Although some studies suggest the safety of isoflurane in at-risk patients undergoing surgery,<sup>3-5</sup> others have shown that isoflurane is a coronary vasodilator in both animals and humans.<sup>1,6-9</sup> and that isoflurane can cause redistribution of myocardial blood flow (intercoronary and transmural steal) in specific animal models.<sup>7,8</sup> Ischemic changes (regional mechanical dysfunction and redistribution of myocardial blood flow) have been demonstrated in canine preparations,<sup>8,10</sup> and association between isoflurane and markers of myocardial ischemia (electrocardiographic and metabolic changes) has been observed in at-risk patients undergoing surgery.<sup>1,11-13</sup> Because more than 400,000 cardiac surgical procedures are performed annually in the United States and 3 million of 25 million noncardiac surgical procedures are performed in patients who have or are at risk for coronary artery disease,<sup>14</sup> it is important that we know whether isoflurane indeed produces myocardial ischemia because, if it does, its use should be limited in such high-risk populations.

Previous studies have helped us to understand isoflurane's ischemic potential but have several limitations, including the number of patients studied,<sup>1,4,5,11-13</sup> the lack of hemodynamic control during the study period,<sup>1,11-13</sup> the lack of comparison of isoflurane to another anesthetic,<sup>1,4,5,11,12</sup> and the use of intermittent- or single-modality measures of ischemia.<sup>1,4,5,11-13</sup> In contrast, we designed a study using continuous and sensitive measures of ischemia (transesophageal echocardiography [TEE] and Holter electrocardiography [ECG]) to assess the relative risk of myocardial ischemia during isoflurane *versus* sufentanil anesthesia, under conditions of strict hemodynamic control.

## Materials and Methods

After institutional approval and informed consent were obtained, 186 patients (185 men and 1 woman, 37–79 yr of age) scheduled for elective coronary artery bypass graft

\* Assistant Professor of Anesthesia.

† Fellow in Anesthesia.

‡ Assistant Clinical Professor of Medicine (Cardiology).

§ Professor of Medicine (Cardiology).

¶ Research Associate.

\*\* Professor of Anesthesia.

†† See Appendix.

Received from the Departments of Anesthesia and Medicine of the University of California, San Francisco, and the Veterans Affairs Medical Center, San Francisco, California. Accepted for publication January 7, 1991. Supported in part by grants from the National Institutes of Health (ROI-HL36744) and the Alberta Heritage Foundation for Medical Research. Presented in part in abstract form at the Annual Meeting of the American Society of Anesthesiologists, 1989 (New Orleans, Louisiana).

Address reprint requests to Dr. Leung: Department of Anesthesia (129), University of California, San Francisco, 4150 Clement Street, San Francisco, California 94121.

(CABG) surgery at the San Francisco Veterans Administration Medical Center between August 1987 and March 1990 were randomized to receive isoflurane or sufentanil anesthesia. The demographic and clinical data collected for each patient included a history of prior myocardial infarction, previous CABG surgery or angioplasty, hypertension, diabetes mellitus, unstable angina, and preoperative cardiac medications. Preoperative ejection fraction was determined by ventriculography and the number of significant coronary arterial stenoses noted. Significant stenosis was defined as a 70% or greater luminal stenosis of the left anterior descending, left circumflex, or right coronary artery and a 50% or greater diameter stenosis of the left main coronary artery.

#### ANESTHETIC MANAGEMENT

The baseline measurements of heart rate (HR) and systolic blood pressure (SBP) were determined by averaging the last five preoperative values obtained for each variable. Measurements of HR and SBP were obtained during the 48-h preoperative period while the patients were on maximal medical therapy. Routine clinical monitors included seven-lead ECG and radial-artery and pulmonary-artery catheters. The end-tidal isoflurane concentration was continuously monitored by mass spectrometry and stored in a microcomputer. All clinicians providing direct patient care were blinded to the research information obtained from the echocardiographic and specialized ECG monitoring.

Patients received diazepam (0.1 mg/kg) and morphine sulfate (0.1 mg/kg) as preanesthetic medication, and all cardiac medications were continued until the time of operation. Sixty-two patients received isoflurane (mean end-tidal isoflurane concentration range, 0.88%  $\pm$  0.31%) and 124 patients received sufentanil (5–10  $\mu\text{g}/\text{kg}$  followed by an infusion rate of 0.07  $\mu\text{g} \cdot \text{kg}^{-1} \cdot \text{min}^{-1}$ ) as the primary anesthetic during the prebypass period. Patients given sufentanil were allowed to receive a maximum of 0.5 mg/kg of diazepam and those receiving isoflurane, a maximum of 0.5 mg/kg of diazepam, 7 mg/kg of sodium thiopental, and 7.5  $\mu\text{g}/\text{kg}$  of fentanyl as adjuvant anesthetics during anesthetic induction. Tracheal intubation was facilitated with the use of muscle relaxants. All patients received 100% inspired oxygen to maintain  $\text{Pa}_{\text{O}_2}$  levels greater than 70 mmHg, and ventilation was controlled to maintain  $\text{Pa}_{\text{CO}_2}$  levels between 35 and 45 mmHg. The lungs of all patients were ventilated with a tidal volume of 10–15 ml/kg.

The anesthesiologists were requested to maintain HR within 20% and SBP within  $\pm 20\%$  of preoperative baseline values throughout the prebypass period. If the anesthesiologist judged anesthetic depth to be inadequate, inspired isoflurane concentrations were increased; and, in

those who received sufentanil, an intravenous bolus of 1  $\mu\text{g}/\text{kg}$  sufentanil was supplemented, followed by an increased infusion rate of 0.01  $\mu\text{g} \cdot \text{kg}^{-1} \cdot \text{min}^{-1}$ . This maneuver was repeated for three cycles, as needed, throughout the prebypass period. After these maneuvers, any hemodynamic aberrations occurring in either group were treated with vasodilators and beta-adrenergic blocking agents, as needed. The administration of vasodilators, vasopressors, beta-adrenergic blocking agents, and inotropic drugs was recorded.

During the postbypass period, patients who received isoflurane before bypass were given morphine sulfate (mean, 42  $\pm$  38 mg; range, 0–145 mg) and those given sufentanil were further randomized to receive sufentanil infusion (62 patients at 1  $\mu\text{g} \cdot \text{kg}^{-1} \cdot \text{h}^{-1}$ ) or morphine sulfate (62 patients: mean, 38  $\pm$  42 mg; range, 0–150 mg). Only data from the prebypass period are presented, to allow comparison between sufentanil and isoflurane anesthetics.

#### TRANSESOPHAGEAL ECHOCARDIOGRAPHY

Immediately after tracheal intubation, a gastroscope tipped with either a 3.5-MHz (Diasonics Inc., Milpitas, CA) or a 5-MHz phased-array transducer (General Electric Co., Milwaukee, WI) was introduced into the esophagus. The transducer was positioned and maintained at the level of the midpapillary muscles to obtain a short-axis view of the left ventricle. Echocardiographic (TEE) data were recorded continuously onto videotapes during the prebypass period (*i.e.*, from completion of tracheal intubation to the onset of cardiopulmonary bypass).

The real-time videotape was edited to obtain samples for analysis. Echocardiographic samples of 60 s duration were obtained every 15 min throughout the prebypass period. Additionally, samples were obtained at other prespecified times to determine whether anesthetic or surgically imposed stresses had any immediate effect on regional wall motion. During the prebypass period, samples were obtained immediately after tracheal intubation and at 4 min before and 1 and 6 min after each of the following surgical events: skin incision, sternotomy, pericardiotomy, and aortic and right atrial cannulation.

The short-axis, cross-sectional image was divided into four segments, with the use of the papillary muscles as guides. This floating-reference system compensated for translational and rotational movements of the heart. A segment was considered suitable for wall-motion analysis if 70% of its entire endocardial outline was visible continuously throughout systole and diastole. All samples were visually analyzed by two investigators by consensus; these investigators were blinded to patient identity, clinical outcome, and time of sampling. The wall motion of each of the four segments was graded as follows: 0 = normal, 1

= mild hypokinesis, 2 = severe hypokinesis with myocardial thickening, 3 = akinesis, and 4 = dyskinesis. Myocardial thickening was estimated by visual inspection in real time and slow motion. Each patient's best prebypass wall motion score was used as his or her baseline score. A "TEE episode"†† suggestive of ischemia was defined by regional wall motion worsening two or more grades and lasting 1 min or longer. The interobserver variability for definition of a TEE ischemic episode was 3% and intraobserver variability was 2% (for both observers), as previously reported.<sup>15</sup>

### ELECTROCARDIOGRAPHY

Electrocardiographic monitoring was performed with a two-channel AM Holter® ECG recorder (Marquette Electronics, series 8500) for two days preoperatively (baseline) and also from the time of anesthetic induction to the onset of cardiopulmonary bypass. The frequency response met the American Heart Association specification for ST changes, the cutoff limit being 0.05 Hz for low frequency and 80 Hz for high frequency. Two bipolar leads, CC5 and modified CM5, were used. Each complete ECG recording on Holter tape was scanned visually with the use of an ECG analysis system (Marquette series 8000). All abnormal QRS complexes (*e.g.*, ventricular ectopic beats and conduction abnormalities) were excluded. A continuous two-lead ST-segment trend was then generated for the entire tape. The baseline ST-segment level was defined as the average ST-segment during a stable period (usually 1 h) preceding each episode. All possible ischemic episodes were reviewed and verified by two investigators who were blinded to patient's identity and outcome. An electrocardiographic ischemic episode was defined as reversible ST-depression  $\geq 0.1$  mV from baseline at J + 60 ms, or  $>0.2$  mV ST elevation at the J-point lasting for at least 1 min. During tachycardia, when J + 60 ms decreased within the T wave, the time after the J-point was shortened to a minimum of J + 40 ms. The characteristics of each electrocardiographic ischemic episode, including the magnitude (ST-segment), duration (episode duration), area-under-the-ST-segment-time-curve (AUC), as well as the ischemic burden (minutes of ischemia/hours monitored), were also determined.

### HEMODYNAMICS

Intraoperatively, SBP and diastolic blood pressure (DBP) were monitored continuously with the use of radial-

artery catheters in all 186 patients. HRs were derived from the ECG tracings. Pulmonary artery systolic and diastolic pressures were monitored continuously in 183 patients (three patients did not have interpretable tracings). SBP, DBP, mean arterial pressure, pulmonary artery pressure, and HR were measured continuously on patient entry into the operating room and stored in a microcomputer (Toshiba T1000; Toshiba Corporation, Tokyo, Japan) using a digital interface system. All hemodynamic data also were recorded continuously onto hard copy at 1 mm/s with a four-channel strip chart recorder (4-Inch Direct Digital Writer®; Marquette) linked to the hemodynamic monitor (Marquette 7010; frequency response, 0.05–120 Hz). Hemodynamic data were averaged every 60 s and entered into the microcomputer. The zero reference point was located 5 cm posterior to the sternal angle in a direction perpendicular to the frontal plane of the chest. The time clocks on the TEE, Holter monitor, and hemodynamic recorder were synchronized before anesthetic induction.

The hemodynamic data were analyzed as follows: 1) HR, SBP, DBP, and pulmonary artery diastolic pressure (PAD) were sampled from the computer every 60 s; 2) data on the hard copy were reviewed to assure that artifacts (such as erroneous values resulting from blood drawing or flushing of catheters) were excluded from analysis; and 3) the data were entered into a computer spreadsheet (Statview 512+®; Brainpower, Calabassas, CA), and the frequency distributions for HR and SBP were determined for the entire prebypass period for each patient.

We defined significant hemodynamic changes as  $>20\%$  increases in HR, SBP, or PAD; or  $>20\%$  decreases in SBP or DBP.

### OPERATIVE TECHNIQUE

Cardiopulmonary bypass was performed with the use of a bubble oxygenator, hemodilution, and moderate systemic hypothermia (26–28° C). Multidose cold blood (8° C; hematocrit 20–25%) with potassium cardioplegia (20 mEq/l) and topical saline/ice slush was used for myocardial protection during cardiopulmonary bypass. Distal anastomoses were performed during continuous aortic cross-clamping, followed by proximal vein grafting during partial aortic occlusion. One hundred seventy-seven patients received vein grafts, and 177 patients received internal mammary-artery grafts to either the left anterior descending or the first diagonal coronary artery. The pericardium was left open in all patients.

The quality of the bypass grafts was assessed by surgeons who were unaware of the echocardiographic and hemodynamic findings. The grafts were graded qualitatively as poor, fair, very good, and excellent.

†† The term "ischemia" is used to indicate those TEE or ECG changes suggestive of ischemia, with consideration that without an independent measure of myocardial blood flow relative to demand, not all such changes are necessarily indicative of ischemia.

OUTCOME MEASUREMENTS

Both 12-lead ECG and creatinine phosphokinase (CPK)-MB isoenzyme concentrations were obtained preoperatively (control) and daily for the first three postoperative days. Adverse major outcomes were myocardial infarction, ventricular failure, or cardiac death. These were defined as follows: 1) myocardial infarction: new Q waves ( $\geq 40$  ms, 25% R-wave) on 12-lead ECG and CPK-MB isoenzyme concentration  $\geq 50$  U/l; 2) ventricular failure: cardiac index  $< 2$  l  $\cdot$  min<sup>-1</sup>  $\cdot$  m<sup>-2</sup> requiring an intraortic balloon pump; and 3) cardiac death: death attributed to cardiac cause during the period of hospitalization. A cardiac cause was defined as dysrhythmia or congestive heart failure resulting from a cardiac condition.

STATISTICAL METHODS

Chi-squared analysis with continuity correction was applied to categoric data. Student's *t* test was used to test the difference between the means in the two groups. Nonparametric data were assessed by the Mann-Whitney U Test. Differences in HR and blood pressure were assessed by one-way analysis of variance using repeated measures. *P* < 0.05 (two-sided) identified significant differences.

Results

Overall, interpretable intraoperative TEE data were obtained for 162 of the 186 patients studied. Interpretable preoperative Holter data were obtained for 176 patients, and interpretable intraoperative Holter data were obtained for 181 patients. Although the two groups were unequal in size, the demographic data and preoperative

TABLE 1. Clinical Data in 186 Patients

|                                | Isoflurane<br>(n = 62) | Sufentanil<br>(n = 124) |
|--------------------------------|------------------------|-------------------------|
| Age (yr)                       | 61 ± 9 (40-79)         | 62 ± 8 (37-79)          |
| Prior myocardial infarction    | 38 (61%)               | 78 (63%)                |
| Prior CABG                     | 2 (3%)                 | 10 (8%)                 |
| Prior angioplasty              | 6 (11%)                | 13 (10%)                |
| Hypertension                   | 42 (68%)               | 68 (55%)                |
| Diabetes mellitus              | 13 (23%)               | 35 (28%)                |
| Unstable angina                | 41 (66%)               | 68 (55%)                |
| Preoperative EF by angiography | 54% ± 14%              | 53% ± 15%               |
| Medications:                   |                        |                         |
| Nitrates                       | 58 (94%)               | 114 (92%)               |
| Calcium channel blockers       | 52 (84%)               | 104 (84%)               |
| β-adrenergic blockers          | 36 (58%)               | 63 (51%)                |
| Number of stenosed vessels     |                        |                         |
| One                            | 3 (5%)                 | 11 (9%)                 |
| Two                            | 15 (24%)               | 33 (27%)                |
| Three or more                  | 44 (71%)               | 80 (65%)                |
| Left main                      | 14 (23%)               | 43 (35%)                |

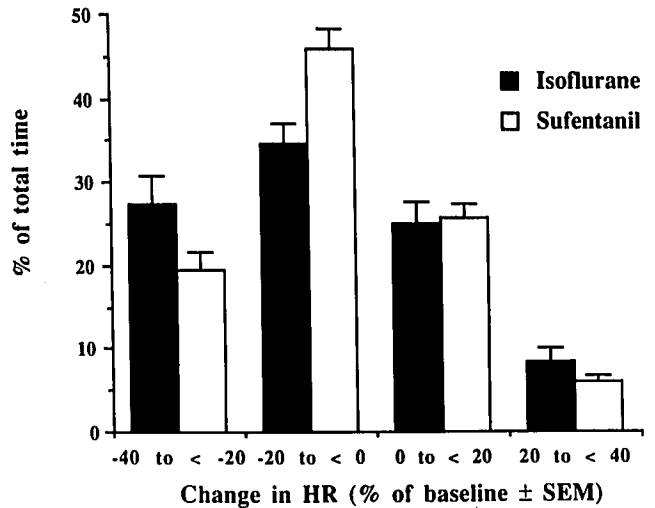

FIG. 1. The frequency distributions of heart rate (HR) as percentage changes from preoperative baseline values in 186 patients.

medications were similar in patients receiving either anesthetic (table 1).

HEMODYNAMIC CONTROL

Hemodynamics were well controlled during the prebypass period (increases in HR = 9.8%, increases in SBP = 7.1%, and decreases in SBP = 10.8% of total monitoring time during the prebypass period compared with preoperative baseline values) (figs. 1 and 2), with no difference between the two anesthetic groups.

TEE EPISODES

Moderate to severe TEE ischemic episodes (grade change  $\geq 2$ ) occurred in 33 of 162 patients (21%), with

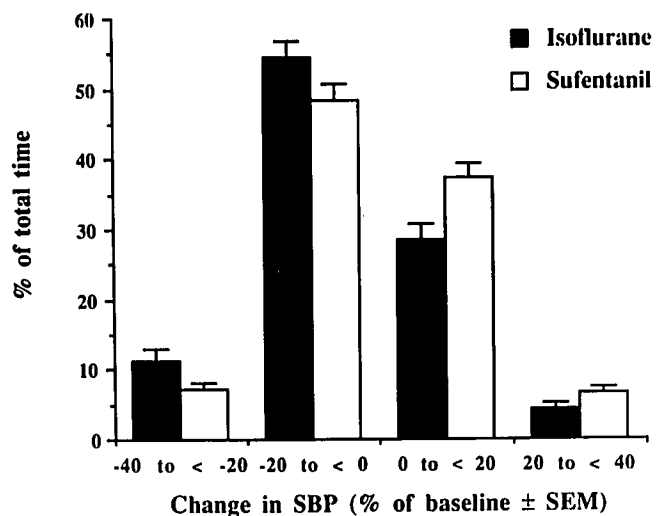

FIG. 2. The frequency distributions of systolic blood pressure (SBP) as percentage changes from preoperative baseline values in 186 patients.

TABLE 2. Characteristics of Prebypass TEE Ischemic Episodes (n = 162)

|                                | Isoflurane  | Sufentanil  | P Value |
|--------------------------------|-------------|-------------|---------|
| Patients (%) with TEE episodes | 21          | 20          | 0.97    |
| Mean duration (min)            | 21 ± 18     | 26 ± 25     | 0.44    |
| Median duration (min)          | 16          | 18          | 0.48    |
| Mean change in WMS             | 2.5 ± 0.8   | 2.7 ± 1.5   | 0.57    |
| Median change in WMS           | 2           | 2           | 0.94    |
| Min ischemia/h monitored       | 14.3 ± 12.2 | 13.8 ± 10.9 | 0.90    |

WMS = wall-motion score. The wall motion of each of the four segments of the left ventricle at the level of the short axis was graded using a five-point scale (see text). A "TEE episode" suggestive of ischemia

was defined by regional wall motion worsening  $\geq 2$  grades and lasting  $\geq 1$  min.

no difference between isoflurane (12 of 56 = 21%) and sufentanil anesthesia (21 of 106 = 20%) ( $P = 0.97$ ; 95% CI for the difference = -14 to 12%). The characteristics of TEE episodes did not differ significantly between the two groups (table 2). Of the 46 TEE episodes that were detected, 7 of 17 (41%) of the episodes that were associated with hemodynamic changes occurred in patients receiving isoflurane and 5 of the 29 (17%) occurred in patients receiving sufentanil. Of the 7 hemodynamically related episodes in the isoflurane-treated group, 3 were related to increases ( $>20\%$ ) in HR, 2 were related to decreases in SBP, 1 was related to increases in SBP, and the last was related to increases in HR, SBP, and PAD. Of the 5 episodes in the sufentanil-treated group, 4 episodes were related to increases in HR and the fifth was related to decreases in SBP. Although TEE episodes in the isoflurane-treated group tended to be preceded by acute changes in hemodynamics (*i.e.*, 41% *vs.* 17% of episodes in the sufentanil-treated group), this difference was not significant ( $P = 0.15$ ). No correlation was observed between TEE ischemic episodes and the isoflurane concentrations (range, 0.47–1.75%).

#### ELECTROCARDIOGRAPHIC EPISODES

Preoperatively, ECG changes suggestive of ischemia developed in 70 of 176 (40%) patients, with no difference between patients who received isoflurane (26 of 59 [44%]) or sufentanil (44 of 117 [38%]) ( $P = 0.51$ ).

Intraoperatively, during the prebypass period, ECG evidence of ischemia developed in 34 of 181 (19%) patients, with no difference between patients who received isoflurane (12 of 59 = 20%) or sufentanil (22 of 122 = 18%) ( $P = 0.87$ ; 95% CI for the difference = -15 to 11%). Of the 34 patients in whom prebypass ECG evidence of ischemia developed, 31 had ST-segment depression. ST-segment elevation developed in 2 other patients, and ST-segment elevation followed by ST-depression developed in the third patient. The characteristics of electrocardiographic ischemic episodes were similar in patients receiving either isoflurane or sufentanil (table 3).

Forty-four of the 176 patients (25%) had only preoperative ischemia, with no difference between patients receiving isoflurane (17 of 59 = 29%) or sufentanil (27 of 117 = 23%) ( $P = 0.52$ ). Eight of the 181 patients (4%) had new ischemia develop in the prebypass period, again with no difference between isoflurane- (3 of 59 = 5%) and sufentanil-treated (5 of 122 = 3%) groups ( $P = 0.93$ ). Contrasting the characteristics of the ischemic episodes in patients in whom electrocardiographic ischemia developed in either the preoperative or prebypass periods, both the mean ST-segment depression and duration were significantly lower in the prebypass period in both the isoflurane- and sufentanil-treated groups (table 4). However, the mean area-under-the-curve and minutes of ischemia/hours monitored were similar in both periods (table 4).

TABLE 3. Characteristics of Prebypass ECG Ischemic Episodes (n = 181)

|                                | Isoflurane  | Sufentanil   | P Value |
|--------------------------------|-------------|--------------|---------|
| Patients (%) with ECG episodes | 20          | 18           | 0.87    |
| Mean ST-depression             | -1.6 ± 0.5  | -1.6 ± 0.7   | 0.93    |
| Median ST-depression           | -1.5        | -1.5         | 0.86    |
| Mean duration (min)            | 37.7 ± 22.9 | 41.3 ± 34.8  | 0.48    |
| Median duration (min)          | 32.0        | 33           | 0.87    |
| Mean AUC                       | -45 ± 37.3  | -53.2 ± 79.6 | 0.72    |
| Median AUC                     | -28.8       | -22.5        | 0.48    |
| Min ischemia/h monitored       | 20.8        | 18.2         | 0.58    |

AUC = area under the ST-segment-time curve, which provides an estimate of the severity of an ECG ischemic episode.

TABLE 4. Comparison Between Preoperative and Prebypass ECG Ischemic Episodes

|                               | Isoflurane    |              |         | Sufentanil   |              |         |
|-------------------------------|---------------|--------------|---------|--------------|--------------|---------|
|                               | Preoperative  | Prebypass    | P Value | Preoperative | Prebypass    | P Value |
| Mean ST-segment (mm)          | -1.6 ± 0.7    | -0.7 ± 0.9   | 0.0009  | -1.8 ± 0.9   | -0.6 ± 0.9   | 0.0001  |
| Mean duration (min)           | 50.3 ± 63.5   | 15.8 ± 24.1  | 0.01    | 38 ± 34.5    | 19 ± 28.2    | 0.01    |
| Mean AUC (mm · min)           | -72.7 ± 143.2 | -17.3 ± 32.9 | 0.05    | -55.9 ± 75.8 | -20.2 ± 46.3 | 0.007   |
| Mean min ischemia/h monitored | 5.1 ± 10.7    | 4.3 ± 10.3   | 0.62    | 2.1 ± 5.7    | 3.1 ± 8.6    | 0.23    |

The mean values displayed above are obtained from those patients who developed ECG evidence of ischemia in either the preoperative and/or the prebypass periods. Forty-four patients had preoperative

ischemia only; 26 patients had both preoperative and prebypass ischemia; and 8 patients had prebypass ischemia only.

Although electrocardiographic episodes in the isoflurane-treated group tended to be preceded by acute changes in hemodynamics (*i.e.*, 50% vs. 35% of episodes in the sufentanil-treated group) this difference was not significant ( $P = 0.6$ ).

RELATIONSHIP BETWEEN TEE AND ELECTROCARDIOGRAPHIC ISCHEMIC EPISODES

Of the 186 patients studied, 155 have both usable intraoperative TEE and Holter data. Of the 46 TEE episodes detected, 13 of 46 (28%) have corresponding ECG changes. Six of the 13 concordant episodes (46%) occurred in patients who received isoflurane, and 7 of 13 (54%) occurred in patients who received sufentanil.

Of the 41 electrocardiographic episodes detected, 11 of 41 (27%) have corresponding TEE changes. Five of the 11 concordant episodes (45%) occurred in patients who received isoflurane, and 5 of 11 (55%) occurred in patients who received sufentanil.

RELATIONSHIP TO INTRAOPERATIVE DRUGS AND SURGICAL EVENTS

The intraoperative drug data are summarized in table 5. Patients who were randomized to receive isoflurane were given significantly more ephedrine and Neo-Synephrine® (Winthrop Pharmaceuticals, New York, NY) to maintain blood pressure. They also received significantly

TABLE 5. Intraoperative Drug Data in 186 Patients

|                          | Isoflurane (n = 62) | Sufentanil (n = 124) | P Value |
|--------------------------|---------------------|----------------------|---------|
| Dopamine                 | 0                   | 1 (1%)               | 0.71    |
| Ephedrine                | 26 (42%)            | 17 (14%)             | 0.0001  |
| Neosynephrine            | 46 (74%)            | 67 (54%)             | 0.01    |
| Nitroglycerin            | 11 (18%)            | 48 (39%)             | 0.006   |
| Nitroprusside            | 0                   | 8 (6%)               | 0.10    |
| Calcium-channel blockers | 1 (2%)              | 1 (1%)               | 0.80    |
| β-adrenergic blockers    | 9 (15%)             | 11 (9%)              | 0.36    |
| Diazepam                 | 53 (85%)            | 120 (97%)            | 0.01    |
| Fentanyl                 | 51 (82%)            | 0                    | 0.0001  |
| Sodium thiopental        | 42 (68%)            | 26 (21%)             | 0.0001  |

more fentanyl and sodium thiopental as adjuncts to the primary anesthetic during anesthetic induction. In contrast, patients who were randomized to receive sufentanil were more likely to receive a vasodilator (nitroglycerin) to decrease blood pressure.

The number of grafts, total aortic cross-clamp time and cardiopulmonary bypass time, and surgeon's overall assessment of the grafts were similar in patients receiving isoflurane or sufentanil (table 6).

RELATIONSHIP TO ADVERSE OUTCOME

The numbers of patients in whom adverse cardiac outcomes developed are summarized in table 6. There was no significant difference in the incidence of adverse outcome between the groups.

Discussion

Our study demonstrated that the risk of myocardial ischemia during isoflurane and sufentanil anesthesia was similar under conditions of strict hemodynamic control.

COMPARISON WITH PREVIOUS STUDIES

The effects of anesthetics on myocardial ischemia have been investigated in animal models and human subjects,

TABLE 6. Surgical and Outcome Data in 186 Patients

|                               | Isoflurane (n = 62) | Sufentanil (n = 124) |
|-------------------------------|---------------------|----------------------|
| Surgical data                 |                     |                      |
| Grafted vessels (number)      | 3 (1-5)             | 3 (1-5)              |
| Aortic cross-clamp time (min) | 59 ± 17             | 59 ± 17              |
| Bypass time (min)             | 102 ± 25            | 104 ± 32             |
| Surgical assessment           |                     |                      |
| 4 (excellent)                 | 14 (25%)            | 28 (24%)             |
| 3 (good)                      | 25 (45%)            | 61 (52%)             |
| 2 (fair)                      | 15 (27%)            | 27 (23%)             |
| 1 (poor)                      | 1 (2%)              | 2 (2%)               |
| Outcome data                  |                     |                      |
| Myocardial infarction         | 3 (5%)              | 8 (6%)               |
| Ventricular failure           | 0                   | 4 (3%)               |
| Cardiac death                 | 1 (2%)              | 3 (2%)               |
| Total outcome                 | 4 (6%)              | 15 (12%)             |

with conflicting results. Direct comparison of the results of these studies with ours is difficult because different methods and measures of myocardial ischemia were used. Additionally, no previous study has examined the risk of myocardial ischemia using rigorous hemodynamic controls and continuous measurement of myocardial ischemia.

#### ANIMAL DATA

The administration of isoflurane during critical stenoses in dogs has resulted in regional myocardial dysfunction suggestive of myocardial ischemia.<sup>10</sup> Using a similar model, Tatekawa *et al.* found that the addition of isoflurane significantly reduced the endocardial-epicardial ratio of the stenosed region, although there was no evidence of ischemia.<sup>16</sup> However, in both studies, the administration of isoflurane was accompanied by 20–40% decreases in mean aortic pressure. Because flow distal to a critical stenosis becomes highly pressure-dependent, it is likely that the observed regional myocardial ischemia occurred secondary to a localized decrease in blood supply from a significant reduction in perfusion pressure.

Buffington *et al.* used a dog model of gradual coronary occlusion and collateral-dependent myocardium to study the effects of isoflurane on coronary hemodynamics.<sup>8</sup> They demonstrated that when the collateral-dependent myocardium was made ischemic at rest by decreasing the regional perfusion, the addition of isoflurane redistributed blood flow from the collateral-dependent to the normally perfused area. Redistribution of blood flow from the endocardium to epicardium, as well as a decrease in systolic contraction, also was observed. However, isoflurane did not induce or worsen myocardial ischemia by redistribution except when the area at risk was pressure-dependent. In contrast, coronary steal was not evident after the administration of isoflurane as an adjuvant anesthetic in a chronic dog model.<sup>17</sup>

Other studies have actually shown beneficial effects of isoflurane in experimental models of myocardial ischemia. Gilbert *et al.* demonstrated that isoflurane was associated with a greater coronary reserve and a better preservation of cardiac function than halothane.<sup>18</sup> Warltier *et al.* found that the time course of recovery of function of previously ischemic myocardium was enhanced by isoflurane equally as well as by halothane, using a chronically instrumented dog model.<sup>19</sup> Davis and Sidi demonstrated that isoflurane had no deleterious effect on acute evolving myocardial infarction in the dog and was associated with salvage of myocardium.<sup>20</sup> The cardioprotective effect of isoflurane may involve reducing the severity of ischemia during coronary artery occlusion by decreasing myocardial oxygen demand.

The results of these animal studies therefore suggest that isoflurane can induce myocardial ischemia when coronary perfusion pressure is decreased and that coronary

steal may occur when the collateral flow is pressure-dependent.<sup>8</sup> However, absence of deleterious or even beneficial effects from isoflurane administration have also been reported.<sup>17–20</sup> The clinical significance of these findings therefore remains uncertain.

#### HUMAN DATA

Results of human studies of isoflurane's effects on coronary hemodynamics also differ. In 21 patients undergoing major vascular surgery, Reiz *et al.* found a 48% incidence of ECG changes suggestive of ischemia during isoflurane anesthesia, and that patients with electrocardiographic ischemic changes had decreased myocardial lactate extraction but a constant coronary flow even though myocardial oxygen consumption was diminished.<sup>1</sup> Because isoflurane caused coronary vasodilation and because correction of blood pressure did not relieve ischemia in some patients, Reiz *et al.* postulated that isoflurane might be causing ischemia by a "steal" mechanism.

Several subsequent studies also demonstrated either ECG or metabolic evidence of myocardial ischemia in patients under isoflurane anesthesia. Moffitt *et al.* studied 10 patients undergoing CABG surgery and reported that lactate production developed in 3 of 10 patients, which was suggestive of regional or global myocardial ischemia.<sup>12</sup> Khambatta *et al.* reported that, in 20 patients with coronary artery disease undergoing isoflurane or halothane anesthesia,<sup>13</sup> global lactate production and ECG changes developed in 4 of 10 patients receiving isoflurane and changes in regional lactate production developed in 3 patients receiving isoflurane. Additionally, the ratio of regional to global perfusion decreased in those receiving isoflurane and was unchanged in those given halothane. In contrast, all patients receiving halothane had net myocardial lactate extraction. These authors concluded that isoflurane has the propensity to induce maldistribution of the coronary circulation and myocardial ischemia and that halothane is a preferable anesthetic in patients with coronary artery disease.

One limitation to interpreting the results of these clinical studies is that anesthetic induction resulted in a 30–45% decrease in coronary perfusion pressure. Therefore, distinguishing between reductions in coronary perfusion pressure and redistribution of blood flow within the myocardium as the cause of ischemia is difficult. One study did attempt to normalize coronary perfusion pressure by the combined use of phenylephrine, nitroglycerin, and pacing in patients with ECG and metabolic changes; however, three of the five patients had persistent signs of myocardial ischemia.<sup>1</sup> Although the author suggested that the persistent ischemia was secondary to coronary steal, this could not be proven by this study. The use of atrial pacing and phenylephrine in patients who were already ischemic may have deleterious effects on the myocardium.

Isoflurane's beneficial effects on coronary hemodynamics have been demonstrated in two studies. Tarnow *et al.* studied 14 patients scheduled for CABG surgery while they were awake and during 0.5% isoflurane anesthesia with 50% N<sub>2</sub>O. ECG evidence of ischemia and/or V-waves in pulmonary capillary wedge pressure occurred at a higher pacing rate during isoflurane anesthesia than in the awake state.<sup>5</sup> O'Young *et al.* found no ECG or metabolic evidence of myocardial ischemia after administration of 0.75–1.0% isoflurane as an adjuvant anesthetic to control intraoperative increases in systemic arterial pressure during sternotomy in patients undergoing CABG surgery.<sup>4</sup> These results also suggest that isoflurane is safe in doses that produce no significant hypotension. When we prospectively and rigorously controlled hemodynamics, we found no difference in the incidence of myocardial ischemia as measured by two sensitive and continuous techniques (ECG and TEE). We also found no difference in the incidence of adverse cardiac outcomes in our patients, although the number of outcomes was small.

In contrast to our findings are the results from a recent study by Inoue *et al.* in patients undergoing elective CABG surgery. These authors reported that the rates of postoperative myocardial infarction were twofold higher and in-hospital deaths were sevenfold higher in patients who received isoflurane than in those who received enflurane.<sup>21</sup> The differences in findings between the two studies are likely attributed to differences in study design. First, in our study, when hemodynamics were controlled rigorously, we were unable to demonstrate a difference in the incidence of myocardial ischemia in patients receiving isoflurane or sufentanil. In the study by Inoue *et al.*, although the authors reported that they attempted to maintain SBP between 110 and 90 mmHg, no data were provided to document the degree of their hemodynamic control. Second, it was possible that the two patient groups in the study of Inoue *et al.* were not equally matched: 1) patients receiving isoflurane had preoperative renal dysfunction more frequently than those receiving enflurane; 2) patients receiving enflurane were more likely to receive nitroglycerin intraoperatively, which may have a protective effect on the myocardium; 3) no data were provided to indicate whether the two different surgical techniques (intermittent aortic cross-clamping with a warm fibrillating heart and continuous aortic cross-clamping) were randomized equally; and 4) the amount of the adjuvant anesthetic, fentanyl, was not provided. Furthermore, the authors indicated that, in case of difficult separation from cardiopulmonary bypass, the anesthesia was actually changed (from enflurane or isoflurane) to intravenous fentanyl and midazolam, making comparison between groups difficult.

In contrast to the study by Inoue *et al.* and in agreement with our findings are two recent prospective outcome studies addressing the issue of anesthetic choice in patients

undergoing CABG surgery.<sup>22,23</sup> They demonstrate that isoflurane is not contraindicated in high-risk patients with coronary disease undergoing CABG surgery and support the hypothesis that anesthetic choice has little bearing on outcome in patients with coronary artery disease. Specifically, no deleterious effects occurred when isoflurane was used as a primary or secondary anesthetic in patients in either of these studies. Although the current study does not include at-risk patients undergoing noncardiac procedures, it is likely that isoflurane also can be used in these patients because they have underlying cardiac risk factors similar to those in our patients.

#### CLINICAL IMPLICATIONS

Our results demonstrate that it is as safe to use isoflurane as sufentanil in high-risk patients when hemodynamics are rigorously controlled. In addition, the current results support our previous report of the prevalence of myocardial ischemia in the preoperative period as measured by ambulatory Holter ECG.<sup>24,25</sup> This ischemic pattern is no worse intraoperatively, and, in fact, the magnitude and duration were suppressed equally well by both isoflurane and sufentanil when hemodynamics are controlled. The myocardial protective effects of anesthetics may involve decreases in myocardial oxygen demand.

#### LIMITATIONS

Several potential limitations exist in this current study. First, we recognize that because there is not an absolute reference standard for measuring myocardial ischemia, validating TEE regional wall motion abnormalities (RWMA) or ECG ST changes is difficult. However, RWMA have been shown to be sensitive and early markers of myocardial ischemia by a number of experimental and clinical studies in animals and humans.<sup>26–34</sup> Our work and that of others have indirectly shown that RWMA detected intraoperatively are likely to be ischemic in origin.<sup>15,35</sup> Similarly, although there are nonischemic causes for ST-segment changes, such as ventricular hypertrophy, altered electrical activity, changes in body temperature, changes in serum electrolytes, ventilatory changes or administration of drugs, most of these changes are usually chronic conditions and not acutely reversible (our definition of electrocardiographic ischemia requires reversible ST-segment changes). Therefore, reversible ST-segment changes are likely to be ischemic. Furthermore, the strong relationship observed between ST-segment abnormalities and the subsequent development of adverse cardiac outcomes suggests the predictive validity of ST abnormalities.<sup>25</sup>

Second, when isoflurane was used as a primary anesthetic, additional adjuvant drugs, including sodium thiopental, fentanyl, and diazepam, were allowed to be administered during anesthetic induction. These agents may have independent or synergistic effects on cardiac per-



formance. However, a "balanced technique" with isoflurane as the primary anesthetic is a more likely technique to be used clinically. The results from this study can therefore be generalized to the larger class of patients with coronary artery disease undergoing general anesthesia with isoflurane as the primary anesthetic.

Third, the intraoperative use of nitroglycerin in controlling blood pressure may potentially confound our results on ischemic measurement. However, additional examination of the results reveals that the incidence of either TEE or electrocardiographic ischemia was not different between patients who were receiving nitroglycerin and those who were not. In the 162 patients who had interpretable TEE data, 35 patients received nitroglycerin and 10 of 35 patients (29%) had TEE evidence of ischemia. In contrast, of the 127 patients who did not receive nitroglycerin, 41 of 127 (32%) had TEE evidence of ischemia ( $P = 0.83$ ). Similarly, in the 181 patients who had interpretable ECG data, 34 patients received nitroglycerin. Twelve of the 34 patients (35%) had ECG evidence of ischemia. Of the 147 patients who did not receive nitroglycerin, 46 of 147 (31%) had ECG evidence of ischemia ( $P = 0.81$ ).

In addition, because significantly more ephedrine and Neo-Synephrine® were administered to patients receiving isoflurane than sufentanil, one could argue that these agents may have a direct effect on the coronary vasculature. If Neo-Synephrine® or ephedrine did play a role in causing coronary vasoconstriction, then the incidence of myocardial ischemia in the isoflurane-treated group might have been lower if these agents were not used, further supporting our data that isoflurane is safe.

Fourth, it has been suggested that isoflurane is not a potent coronary vasodilator and that only a subset of patients with "steal-prone" coronary anatomy (total occlusion of at least one major coronary artery, and a concomitant hemodynamically significant stenosis of the collateral-supplying vessel) are likely to be susceptible to the development of coronary steal.<sup>36</sup> Although the current report has not specifically addressed this issue, the coronary anatomy of all the studied patients will be stratified in a future report to examine whether intraoperative myocardial ischemia is more likely to develop in those with a "steal-prone anatomy" while they are under isoflurane anesthesia.

Fifth, although the ischemic episodes (TEE or ECG) in the isoflurane-treated group tended to be more frequently preceded by acute changes in hemodynamics than in the sufentanil-treated group, we were unable to demonstrate a statistically significant difference, probably because the number of ischemic episodes was small in our study. However, one could argue that if hemodynamics were even "better controlled" in the isoflurane-treated group, the incidence of ischemia might have been even lower.

Finally, one could argue that our sample size may not be sufficient for detection of a difference between groups.

Although we observed no difference in the proportion of patients in whom ischemia (TEE or ECG) developed in the two groups ( $P = 0.97$  and  $P = 0.87$ ), we cannot exclude the possibility of a small difference in ischemia between the two anesthetics.

In conclusion, our study demonstrates that, under strict hemodynamic control, isoflurane anesthesia was associated with an incidence of myocardial ischemia (TEE or ECG) similar to that of sufentanil anesthesia. Furthermore, both the magnitude and duration of electrocardiographic ischemia appeared to be blunted during the prebypass period compared with those in the preoperative period, and to be blunted equally well by both anesthetics. These results also suggest that, under conditions of strict hemodynamic control, anesthetics may have a protective effect on the myocardium at risk.

The authors thank staff anesthesiologists (Robert Hickey, M.D., Martin London, M.D.) and surgeons (Edward Verrier, M.D., Fraser Keith, M.D., Scott Merrick, M.D.) for their cooperation and support in making this study possible. They also thank the anesthesia residents from Letterman Army Medical Center, San Francisco (Eric Helander, M.D., James Helman, M.D., Joseph Scaniffe, M.D., Mark Woiwood, M.D.) for their participation, and Warren Browner, M.D., for statistical advice.

## References

1. Reiz S, Bålfors E, Sørensen V, Ariola SJ, Friedman A, Truedsson H: Isoflurane—a powerful coronary vasodilator in patients with coronary artery disease. *ANESTHESIOLOGY* 59:91–97, 1983
2. Becker L: Is isoflurane dangerous for the patient with coronary artery disease? (editorial) *ANESTHESIOLOGY* 66:259–261, 1987
3. Hess W, Arnold B, Schulte-Sasse U, Tarnow J: Comparison of isoflurane halothane when used to control intraoperative hypertension in patients undergoing coronary artery bypass surgery. *Anesth Analg* 62:15–20, 1983
4. O'Young J, Mastrocostopoulos G, Hilgenberg A, Palacios I, Kyritsis A, Lappas D: Myocardial circulatory and metabolic effects of isoflurane and sufentanil during coronary artery surgery. *ANESTHESIOLOGY* 66:653–658, 1987
5. Tarnow J, Marksches-Hornung A, Schulte-Sasse U: Isoflurane improves the tolerance to pacing-induced myocardial ischemia. *ANESTHESIOLOGY* 64:147–156, 1986
6. Sill J, Bove A, Nugent M, Blaise G, Dewey J, Grabau C: Effects of isoflurane on coronary arteries and coronary arterioles in the intact dog. *ANESTHESIOLOGY* 66:273–279, 1987
7. Priebe H: Differential effect of isoflurane on right and left ventricular performances, and on coronary, systemic, and pulmonary hemodynamics in the dog. *ANESTHESIOLOGY* 66:262–272, 1987
8. Buffington C, Romson J, Levine A, Duttlinger N, Huang A: Isoflurane induces coronary steal in a canine model of chronic coronary occlusion. *ANESTHESIOLOGY* 66:280–292, 1987
9. Hickey R, Sybert P, Verrier E, Cason B: Effects of halothane, enflurane, and isoflurane on coronary blood flow autoregulation and coronary vascular reserve in the canine heart. *ANESTHESIOLOGY* 68:21–30, 1987
10. Priebe H, Föex P: Isoflurane causes regional myocardial dysfunction in dogs with critical coronary artery stenoses. *ANESTHESIOLOGY* 66:293–300, 1987
11. Reiz S, Östman M: Regional coronary hemodynamics during isoflurane-nitrous oxide anesthesia in patients with ischemic heart disease. *Anesth Analg* 64:570–576, 1985

12. Moffitt E, Barker R, Glen J, Imrie D, DelCampo C, Landymore R, Kinley E, Murphy D: Myocardial metabolism and hemodynamic responses with isoflurane anesthesia for coronary arterial surgery. *Anesth Analg* 65:53-61, 1986
13. Khambatta H, Sonntag H, Larsen R, Heidrun S, Stone G, Kettler D: Global and regional myocardial blood flow and metabolism during equipotent halothane and isoflurane anesthesia in patients with coronary artery disease. *Anesth Analg* 67:936-942, 1988
14. Mangano D: Perioperative cardiac morbidity (review). *ANESTHESIOLOGY* 72:153-184, 1990
15. Leung J, O'Kelly B, Browner W, Tubau J, Hollenberg M, Mangano D, SPI Research Group: Prognostic importance of postbypass regional wall-motion abnormalities in patients undergoing coronary artery bypass graft surgery. *ANESTHESIOLOGY* 71:16-25, 1989
16. Tatekawa S, Traber K, Hantler C, Tait A, Gallagher K, Knight T: Effects of isoflurane on myocardial blood flow, function, and oxygen consumption in the presence of critical coronary stenosis in dogs. *Anesth Analg* 66:1073-1082, 1987
17. Cason B, Verrier E, London M, Mangano D, Hickey R: Effects of isoflurane and halothane on coronary vascular resistance and collateral myocardial blood flow: Their capacity to induce coronary steal. *ANESTHESIOLOGY* 67:665-675, 1987
18. Gilbert M, Roberts S, Mori M, Blomberg R, Tinker J: Comparative coronary vascular reactivity and hemodynamics during halothane and isoflurane anesthesia in swine. *ANESTHESIOLOGY* 68:243-253, 1988
19. Warltier D, Al-Wathiqui M, Kampine J, Schmeling W: Recovery of contractile function of stunned myocardium in chronically instrumented dogs is enhanced by halothane or isoflurane. *ANESTHESIOLOGY* 69:552-565, 1988
20. Davis R, Sidi A: Effect of isoflurane on the extent of myocardial necrosis and on systemic hemodynamics, regional myocardial blood flow, and regional myocardial metabolism in dogs after coronary artery occlusion. *Anesth Analg* 69:575-586, 1989
21. Inoue K, Reichelt W, El-Banayasy A, Minami K, Dallmann G, Hartmann N, Windeler J: Does isoflurane lead to a higher incidence of myocardial infarction and perioperative death than enflurane in coronary artery surgery? A clinical study of 1178 patients. *Anesth Analg* 71:469-474, 1990
22. Slogoff S, Keats A: Randomized trial of primary anesthetic agents on outcome of coronary bypass operations. *ANESTHESIOLOGY* 70:179-188, 1989
23. Tuman K, McCarthy R, Spiess B, Davalle M, Dabir R, Ivankovich A: Does choice of anesthetic agent significantly affect outcome after coronary artery surgery? *ANESTHESIOLOGY* 70:189-198, 1989
24. Knight AA, Hollenberg M, London MJ, Tubau J, Verrier E, Browner W, Mangano DT, SPI Research Group: Perioperative myocardial ischemia: Importance of the perioperative ischemic pattern. *ANESTHESIOLOGY* 68:681-688, 1988
25. Mangano D, Browner W, Hollenberg M, London M, Tubau J, Tateo I, Group SR: Association of perioperative myocardial ischemia with cardiac morbidity and mortality in men undergoing noncardiac surgery. *N Engl J Med* 323:1781-1788, 1990
26. Tennant R, Wiggers C: The effect of coronary occlusion on myocardial contraction. *Am J Physiol* 112:351-361, 1935
27. Kerber R, Marcus M, Ehrhardt J, Wilson R, Abboud F: Correlation between echocardiographically demonstrated segmental dyskinesia and regional myocardial perfusion. *Circulation* 52:1097-1104, 1975
28. Gallagher K, Kumada T, Koziol J, McKown M, Kemper W Jr: Significance of regional wall thickening abnormalities relative to transmural myocardial perfusion in anesthetized dogs. *Circulation* 62:1266, 1980
29. Vatner S: Correlation between acute reductions in myocardial blood flow and function in conscious dogs. *Circ Res* 47:201-207, 1980
30. Pandian N, Kerber R: Two-dimensional echocardiography in experimental coronary stenosis: I. Sensitivity and specificity in detecting transient myocardial dyskinesia: Comparison with sonomicrometers. *Circulation* 66:597-602, 1982
31. Pandian N, Kieso R, Kerber R: Two-dimensional echocardiography in experimental coronary stenosis: II. Relationship between systolic wall thinning and regional myocardial perfusion in severe coronary stenosis. *Circulation* 66:603-611, 1982
32. Alam M, Khaja F, Brymer J, Marzelli M, Goldstein S: Echocardiographic evaluation of left ventricular function during coronary artery angioplasty. *Am J Cardiol* 57:20-25, 1986
33. Hauser A, Gangadharan V, Ramos R, Gordon S, Timmis G, Duddlets P: Sequence of mechanical, electrocardiographic and clinical effects of repeated coronary artery occlusion in human beings: Echocardiographic observations during coronary angioplasty. *J Am Coll Cardiol* 5:193-197, 1985
34. Wohlgelelnter D, Cleman M, Highman H, Fetterman R, Duncan J, Zaret B, Jaffe C: Regional myocardial dysfunction during coronary angioplasty: Evaluation by two-dimensional echocardiography and 12 lead electrocardiography. *J Am Coll Cardiol* 7:1245-1254, 1986
35. Smith J, Cahalan M, Benefiel D, Byrd B, Lurz F, Shapiro W, Roizen M, Bouchard A, Schiller N: Intraoperative detection of myocardial ischemia in high-risk patients: Electrocardiography versus two-dimensional transesophageal echocardiography. *Circulation* 72:1015-1021, 1985
36. Buffington C, Davis K, Gillispie S, Pettinger M: The prevalence of steal-prone coronary anatomy in patients with coronary artery disease: An analysis of the Coronary Artery Surgery Study Registry. *ANESTHESIOLOGY* 69:721-727, 1988

## Appendix

The SPI (Study of Perioperative Ischemia) Research Group consists of the following: Principal investigator—Dennis T. Mangano, Ph.D., M.D.; associate investigators—Warren S. Browner, M.D., M.P.H., Milton Hollenberg, M.D., Julio F. Tubau, M.D. (former member), Jacqueline M. Leung, M.D., William C. Krupski, M.D., Joseph A. Rapp, M.D., Marcus W. Hedgcock, M.D., Edward D. Verrier, M.D. (former), Scott Merrick, M.D.; technical staff/research associates—M. Lou Meyer, M.S. (former), Linda Levenson, B.S., Martin G. Wong, B.S., R.D.M.S. (former), Elizabeth Layug, M.D., Juliet Li, M.D., Maria E. Franks, R.N., Yuriko C. Wellington, M.S. (former), Mara Balasubramanian, M.D. (former), Evelyn Cembrano, M.D. (former), Wilfredo Velasco, M.D., Nonato Pineda, M.D., Safullah N. Katiby, M.D. (former); administrative/editorial assistance—Thea Miller; editorial advice—Winifred von Ehrenburg; research fellows—Brian F. O'Kelly, M.B. (former), Jadwiga Szlachcic, M.D. (former), Andrew A. Knight, M.D. (former), Virginia Fegert M.D. (former), Paul Goehner, M.D. (former), David N. Harris, M.D., F.F.A.R.C.S. (former), Deanna Siliciano, M.D. (former), Nancy H. Mark, M.D. (former), Randy Smith, M.D. (former), James Helman, M.D.; data management—Ida M. Tateo, M.S., Jeffrey Tice, B.S. (former), Cary Fox, M.A., Angela Heithaus, B.S. (former); consultants—Jonathan Showstack, Ph.D., Diana C. Nicoll, M.D., Ph.D., Paul Heineken, M.D., Barry Massie M.D.; policy and data monitoring board—Kanu Chatterjee, M.B., F.R.C.P., H. Barrie Fairley, M.D., Lawrence W. Way, M.D., Warren Winkelstein, M.D., M.P.H. (chairman).
